# Supplementary material for: Using Open Public Meetings and Elections to Promote Inward Transparency and Accountability: Lessons From Zambia
Source: PubMed Central journal article supplement (PMC9278615; doi:10.34172/ijhpm.2020.84), 2020-06-23
Supplement: ijhpm-11-160-s003.pdf [file ijhpm-11-160-s003.pdf]

**Supplementary file 3.** Templates for the Annual General Meeting Agenda, Activity Report, and Finance Report

**(1) AGM Agenda Template:**

**ANNUAL GENERAL MEETING AGENDA**

**Name of Committee/Association**

**Time, Date & Venue**

1. Opening of Meeting
2. Apologies
3. Confirmation of Minutes of previous Annual General Meeting
4. Presentation of Annual Report (chairperson's report)
2. Adoption of Annual Report
3. Presentation of Treasurer's report
4. Adoption of treasurer's report
5. Tenure/Election of New Executive/committee
6. Vote of thanks to outgoing Executive
7. Determination of Annual Membership Fee (optional)
8. Notice/s of Motion
9. Urgent general business
10. Closure

**(2) Activity Report Template:**

**ACTIVITY REPORT TEMPLATE**

**NAME:** .....

**DISTRICT:**

.....

**a) Leadership**

| <b>NAME</b> | <b>SEX</b> | <b>DATE JOINED</b> | <b>POSITION</b> | <b>SUB-COMMITTEE</b> |
|-------------|------------|--------------------|-----------------|----------------------|
|             |            |                    |                 |                      |
|             |            |                    |                 |                      |
|             |            |                    |                 |                      |
|             |            |                    |                 |                      |

**b) Planned activities**

**c) Implemented activities**

**d) Progress on specific MWH activities**

**1. Maternity waiting home status, assets and activities**

Status:

.....  
.....

Assets:

.....  
.....

Activities:

.....  
.....

Utilization rates:

.....  
.....

**2. IGA**

Type of IGA:

.....  
.....

Date started:

.....  
.....

Achievements:

.....  
.....

Challenges:

.....  
.....

Recommendations:

.....

**3. Keyhole gardening:**

How many have been constructed?

.....

How many are fenced? .....

How many are currently planted?

.....

Number of harvests since construction?

.....

Challenges:

.....  
.....

Recommendations:

.....

Key achievements during the period under review:

.....  
.....

Key challenges during the period under review:

.....  
.....

**(3) Finance Report Template:**

**Reporting period (Month - Month Year)**

|                                                                  |                                  |   |                 |
|------------------------------------------------------------------|----------------------------------|---|-----------------|
| <b>A Income (From hammer mill, maize bran &amp; Maize sales)</b> |                                  |   |                 |
| <b>Community contribution</b>                                    |                                  | - |                 |
| <b>Total</b>                                                     |                                  |   |                 |
| <b>B Expenditure</b>                                             |                                  |   | <b>Comments</b> |
| 1                                                                | Diesel                           |   |                 |
| 2                                                                | Servicing                        |   |                 |
| 3                                                                | Wire fence and poles             |   |                 |
| 4                                                                | Construction labor               |   |                 |
| 5                                                                | Stipends                         |   |                 |
| 6                                                                | Purchase of blocks               |   |                 |
| 7                                                                | Cooperative registration         |   |                 |
| 8                                                                | Mother's shelter support         |   |                 |
| 9                                                                | Transport                        |   |                 |
| 10                                                               | Commemorations of world aids day |   |                 |
| 11                                                               | Food-meetings                    |   |                 |
| 12                                                               | Exchange visit                   |   |                 |
| 13                                                               | Empty bags and grease            |   |                 |
| 14                                                               | Emergency fund                   |   |                 |
| 15                                                               | Depreciation                     |   |                 |
| 16                                                               | Mother's shelter Assets savings  |   |                 |
| <b>C</b>                                                         | <b>Total expenditure</b>         | - |                 |
| <b>D</b>                                                         | <b>Variance</b>                  | - |                 |
| <b>E</b>                                                         | <b>Cash at bank</b>              |   |                 |

Prepared by:.....

Date:.....

Reviewed by:.....

Date:.....
